# Supplementary material for: Improved synergic therapeutic effects of chemoradiation therapy with the aid of a co-drug-loaded nano-radiosensitizer under conventional-dose X-ray irradiation
Source: Royal Society of Chemistry journal article supplement (doi:10.1039/d0bm00353k), 2020-01-01
Supplement: d0bm00353k1.pdf [file d0bm00353k1.pdf]

## Supporting Information

### **Improvement synergic therapeutic effect of chemoradiation therapy with the aid of co-drug loaded nano-radiosensitizer under conventional-dose of X-Ray irradiation**

**Hamed Nosrati <sup>1,2</sup>, Jalil Charmi <sup>1</sup>, Fatemeh Abhari <sup>3</sup>, Elahe attari <sup>1</sup>, Shayesteh Bochani <sup>1</sup>, Behrooz Johari <sup>4</sup>, Hamed Rezaeejam <sup>5</sup>, Hamidreza Kheiri Manjili<sup>1</sup>, Soodabeh Davaran<sup>6\*</sup>, Hossein Danafar <sup>1,2\*</sup>**

- 1- Zanzan Pharmaceutical Nanotechnology Research Center, Zanzan University of Medical Sciences, Zanzan, Iran
- 2- Department of pharmaceutical biomaterials, School of Pharmacy, Zanzan University of Medical Sciences, Zanzan, Iran.
- 3- Faculty of Medicine, Department of Medical Physics, Tabriz University of Medical Sciences, Tabriz, Iran
- 4- Department of Medical Biotechnology, School of Medicine, Zanzan University of Medical Sciences, Zanzan, Iran
- 5- Department of Radiology, School of Paramedical and Health, Zanzan University of Medical Sciences, Zanzan, Iran
- 6- Drug Applied Research Center, Tabriz University of Medical Sciences, P.O. Box: 51656-65811, Tabriz, Iran

\*Corresponding Author's E-mail: [davaran@tbzmed.ac.ir](mailto:davaran@tbzmed.ac.ir) (S. Davaran) and [danafar@zums.ac.ir](mailto:danafar@zums.ac.ir) (H. Danafar).

**Number of pages: 8**

**Number of Figures: 9**

**Number of tables: 0**

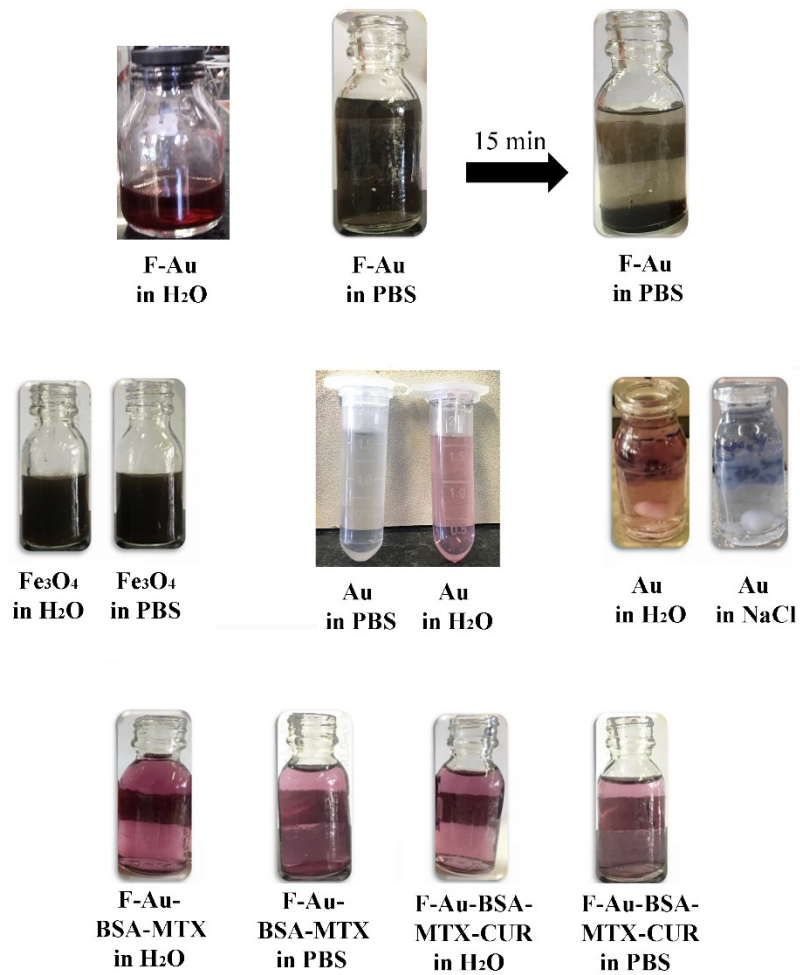

Fig. 1S. Color images of different nanoparticles dispersed at PBS and deionized water.

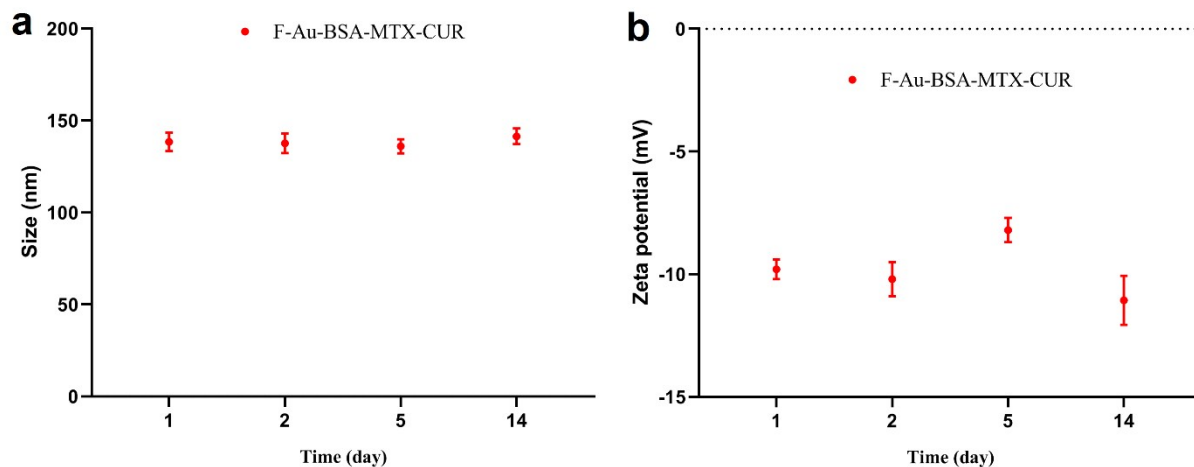

Fig. 2S. Size and zeta potential monitoring of F-Au-BSA-MTX-CUR throughout 14 days.

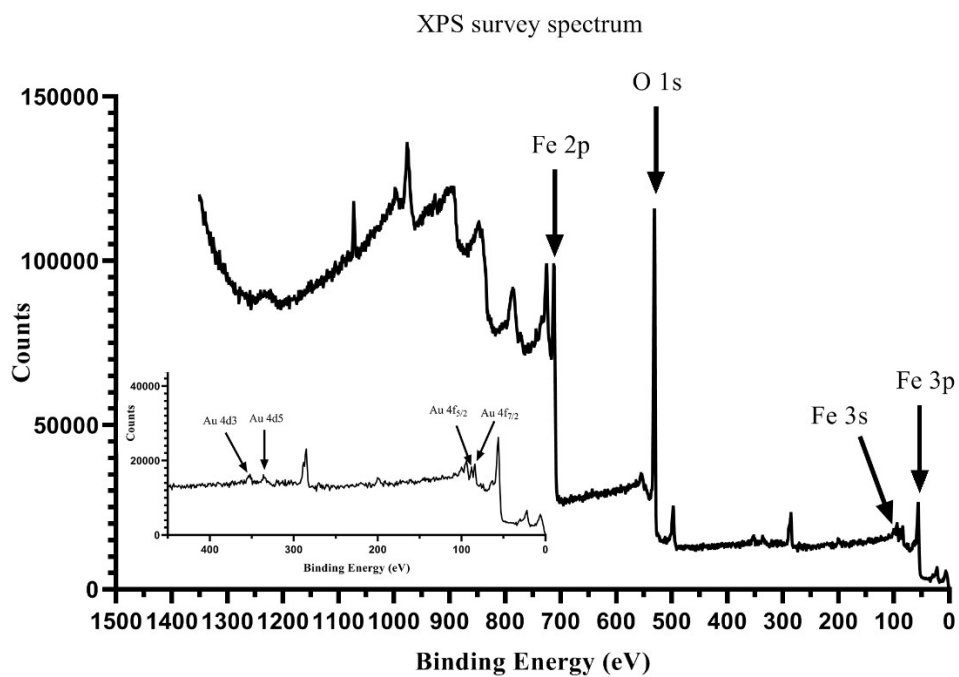

Fig. 3S. XPS survey spectra of F-Au.

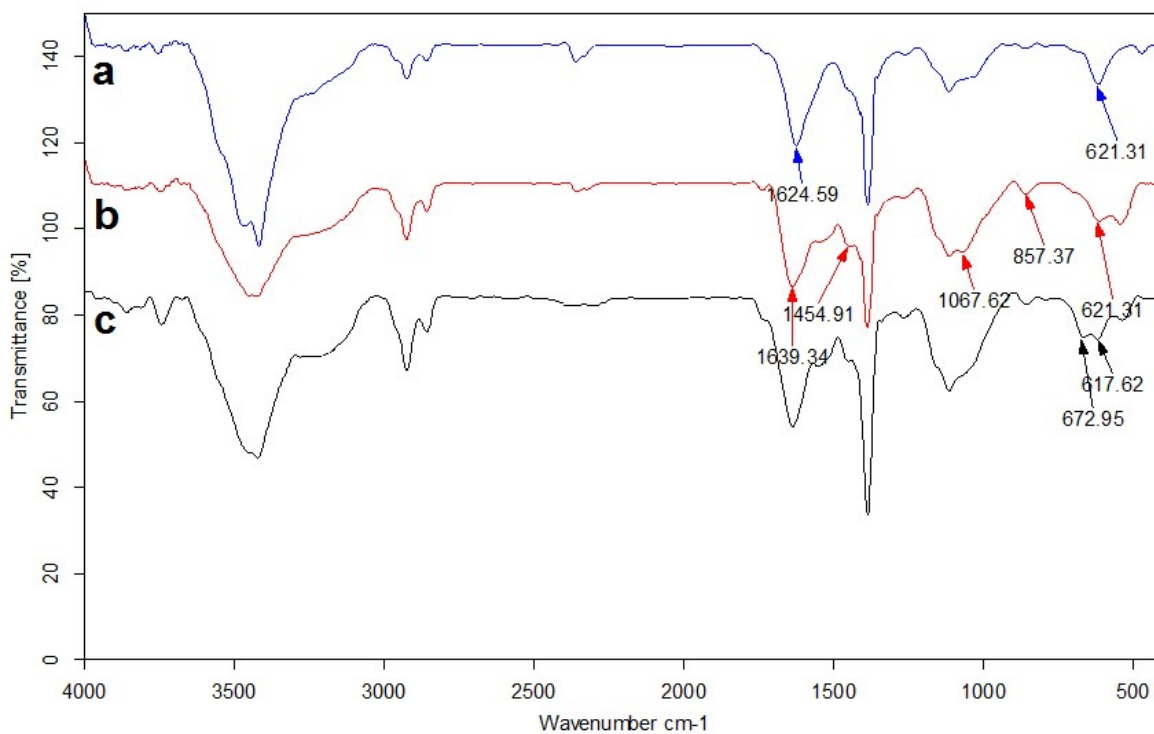

Fig. 4S. FTIR spectra of : a) F-Au, b) F-Au-BSA-MTX, and c) F-Au-BSA-MTX-CUR.

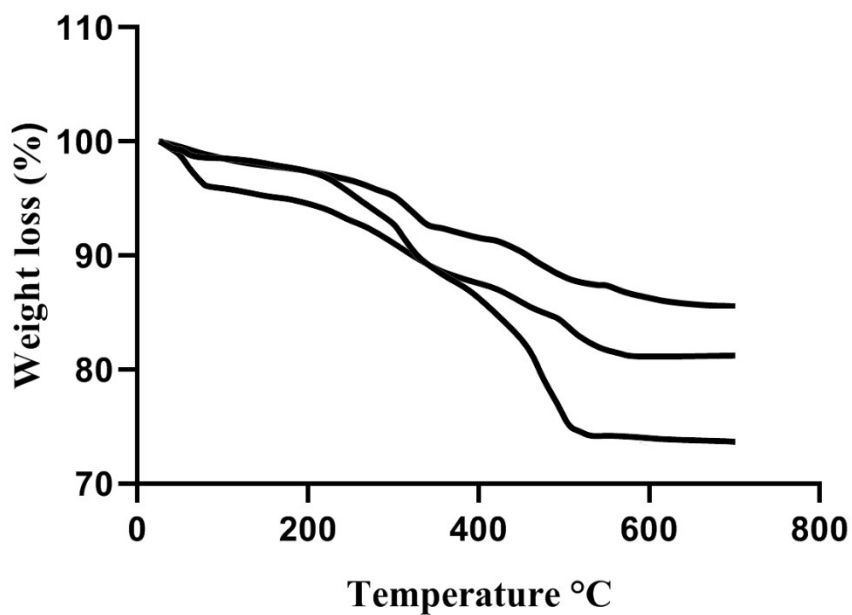

Fig. 5S. Thermograms of the F-Au-BSA and F-Au-BSA-MTX and F-Au-BSA-MTX-CUR

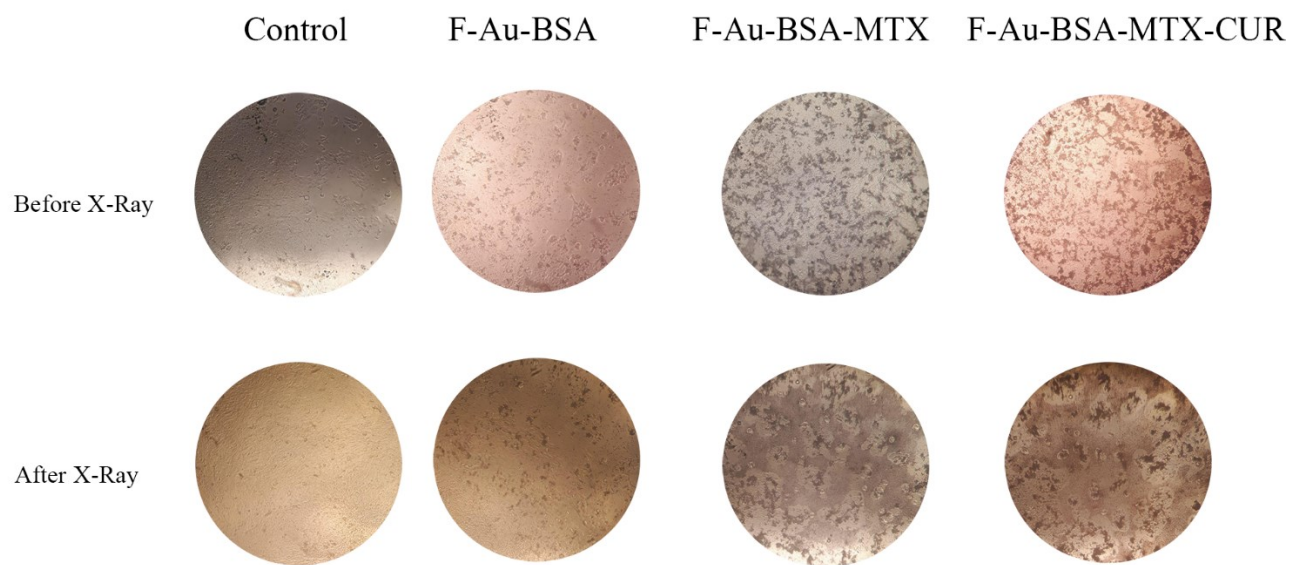

Fig. 6S. Microscopic images of treated 4T1 cells with F-Au-BSA, F-Au-BSA-MTX, and F-Au-BSA-MTX-CUR samples before and after X-Ray irradiation.

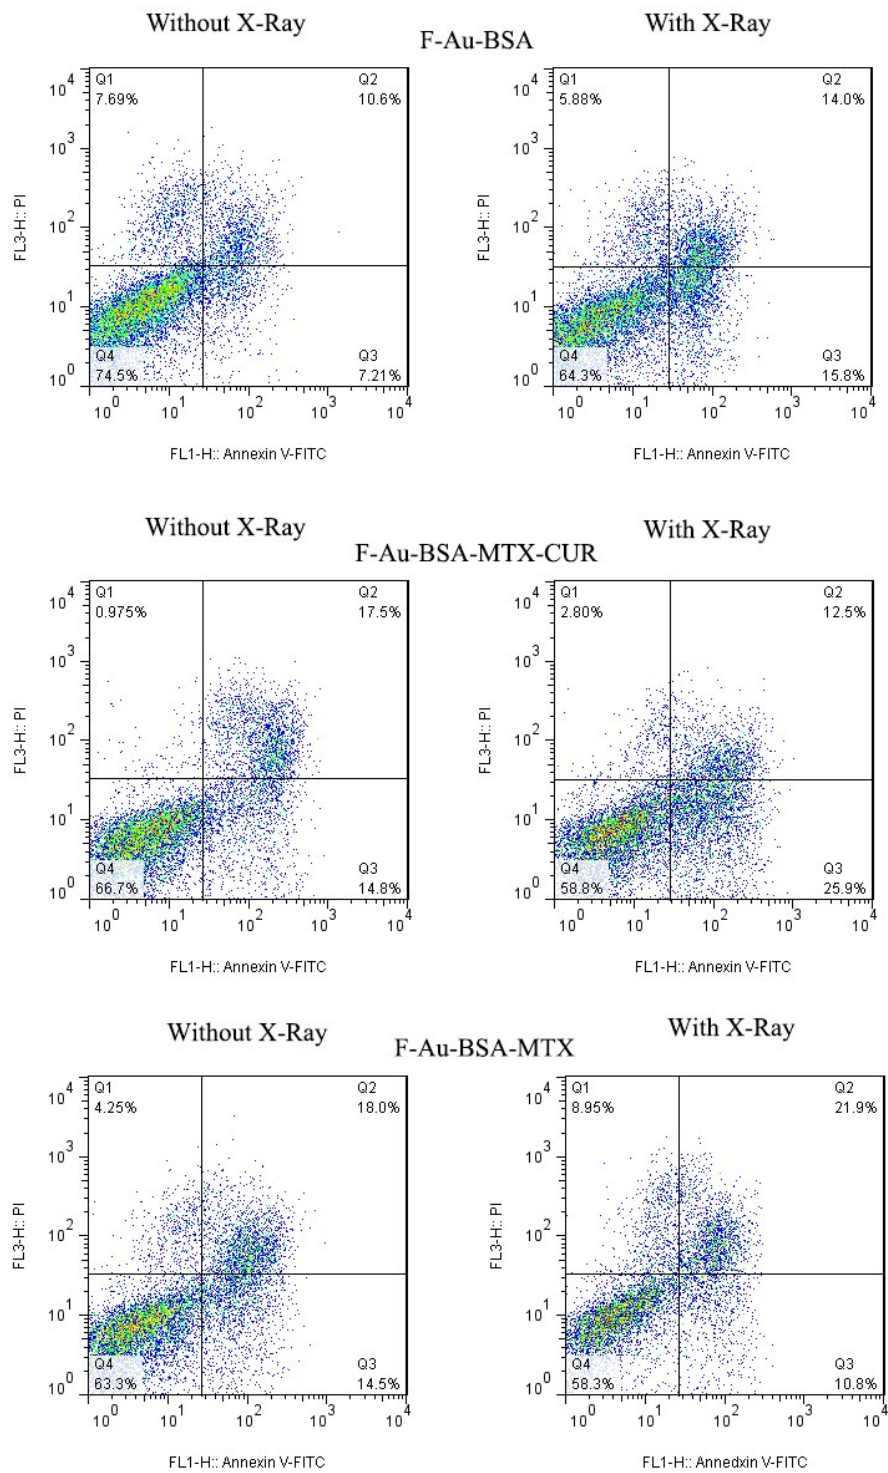

Fig. 7S. Flow chart of flow cytometry analysis.

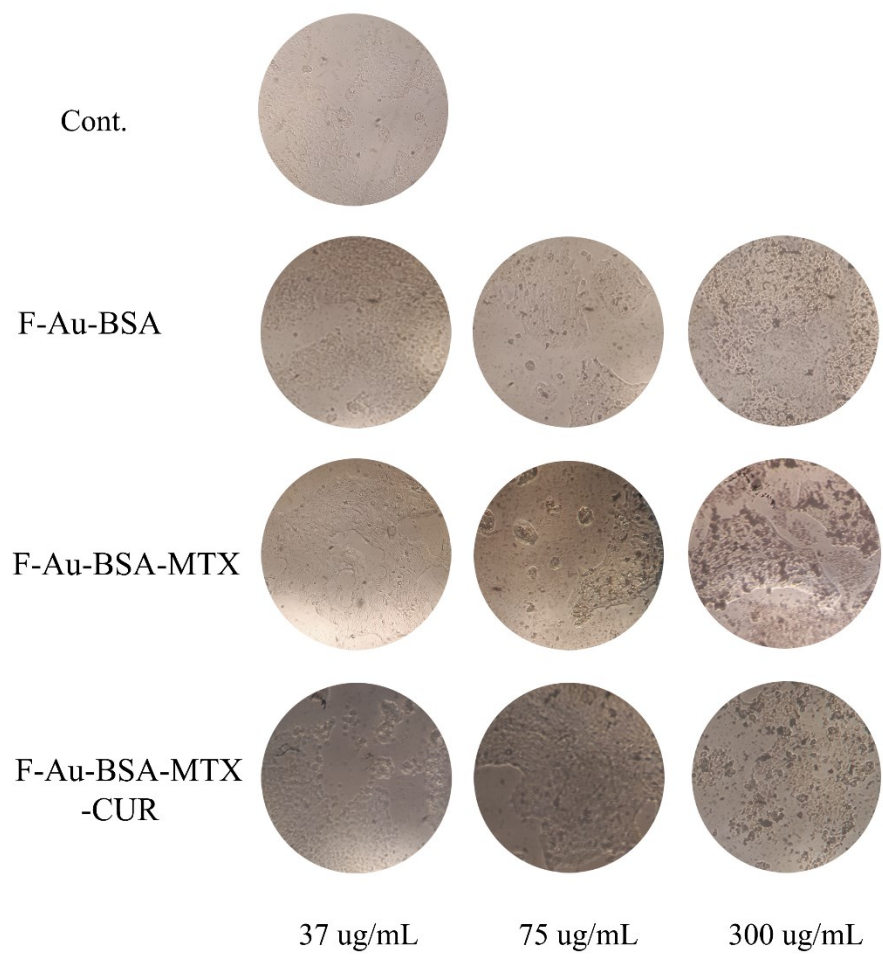

Fig. 8S. Microscopic images of treated 4T1 cells with F-Au-BSA, F-Au-BSA-MTX, and F-Au-BSA-MTX-CUR samples.

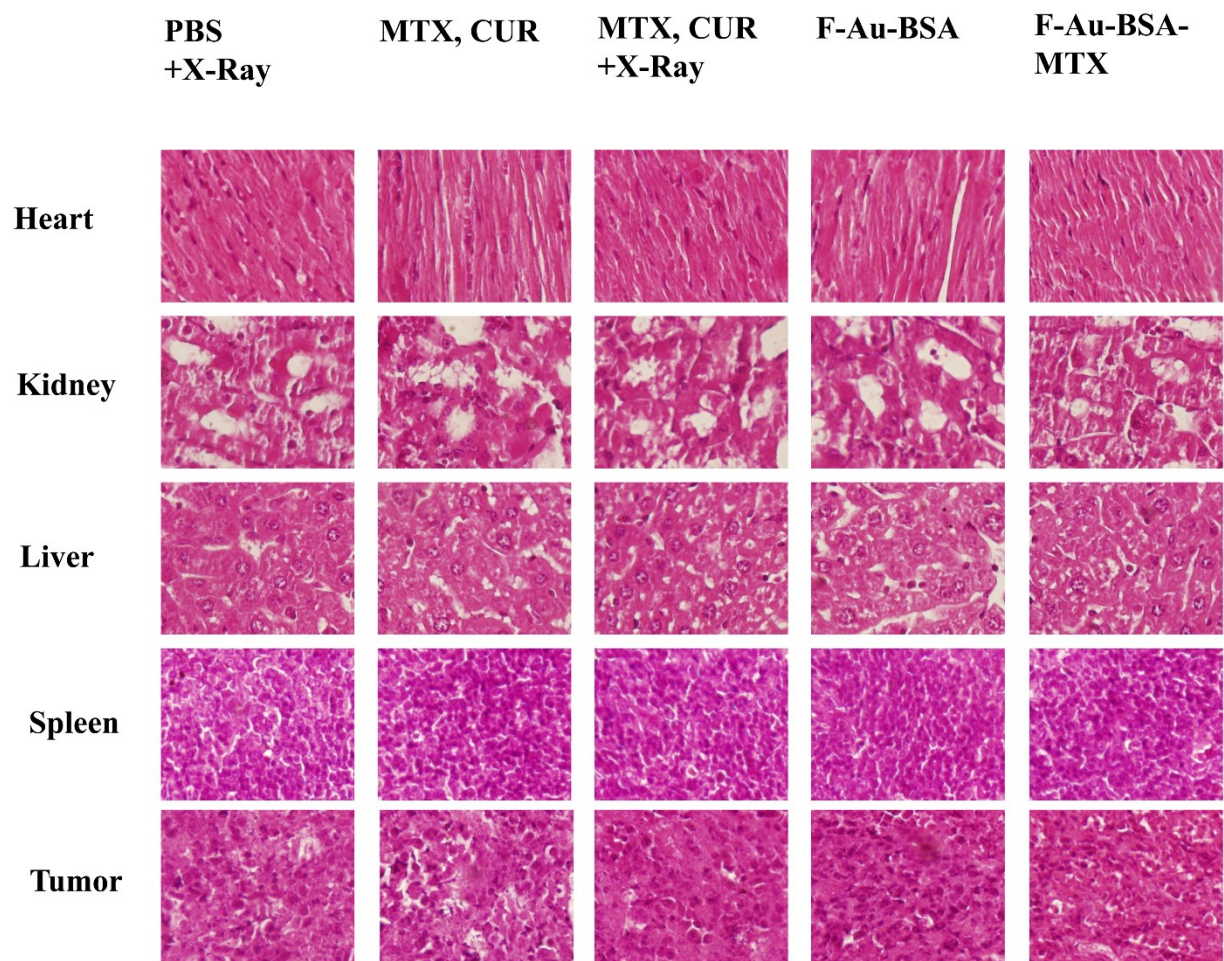

Fig. 9S. Representative images of H&E staining of the tumors and key organs.
